# Supplementary material
Source: PubMed Central journal article supplement (PMC4297285)
Supplement: NIHMS221289-supplement-1.pdf [file NIHMS221289-supplement-1.pdf]

## Supplementary Information

### Germline *CBL* mutations cause developmental abnormalities and predispose to juvenile myelomonocytic leukemia

Charlotte M. Niemeyer<sup>\*1</sup>, Michelle W. Kang<sup>\*2</sup>, Danielle H. Shin<sup>\*2</sup>, Ingrid Furlan<sup>1</sup>, Miriam Erlacher<sup>1</sup>, Nancy J Bunin<sup>3</sup>, Severa Bunda<sup>4</sup>, Jerry Z. Finklestein<sup>5</sup>, Thomas A. Gorr<sup>1</sup>, Parinda Mehta<sup>6</sup>, Irene Schmid<sup>7</sup>, Gabriele Kropshofer<sup>8</sup>, Selim Corbacioglu<sup>9</sup>, Peter J Lang<sup>10</sup>, Christoph Klein<sup>11</sup>, Paul-Gerhard Schlegel<sup>12</sup>, Andrea Heinzmann<sup>1</sup>, Michaela Schneider<sup>1</sup>, Jan Stary<sup>13</sup>, Marry M. van den Heuvel-Eibrink<sup>14</sup>, Henrik Hasle<sup>15</sup>, Franco Locatelli<sup>16</sup>, Debbie Sakai<sup>2</sup>, Sophie Archambeault<sup>2</sup>, Leslie Chen<sup>2</sup>, Ryan C. Russell<sup>4</sup>, Stephanie S. Sybingco<sup>4</sup>, Michael Ohh<sup>4</sup>, Benjamin S. Braun<sup>2</sup>, Christian Flotho<sup>1</sup>, Mignon L. Loh<sup>2</sup>.

<sup>1</sup>Department of Pediatrics and Adolescent Medicine, University of Freiburg, Freiburg, Germany; <sup>2</sup>Department of Pediatrics and the Comprehensive Cancer Center, University of California, San Francisco, San Francisco, CA, United States; <sup>3</sup>Division of Oncology, Children's Hospital of Philadelphia, Philadelphia, PA, United States; <sup>4</sup>Department of Laboratory Medicine and Pathobiology, University of Toronto, 1 King's College Circle, Toronto, Ontario M5S 1A8, Canada; <sup>5</sup>Miller Children's Hospital/Harbor-UCLA, Jonathan Jaques Cancer Center, Long Beach, CA, United States; <sup>6</sup>Division of Hematology-Oncology, Cincinnati Children's Hospital Medical Center, Cincinnati, OH, United States; <sup>7</sup>von Hauner Children's Hospital, LMU Munich University, Munich, Germany; <sup>8</sup>Department of Pediatrics and Adolescent Medicine, Medical University, Innsbruck, Austria; <sup>9</sup>Department of Pediatrics, University of Ulm, Ulm, Germany; <sup>10</sup>Dept. of Pediatrics, University of Tübingen, Germany; <sup>11</sup>Department of Pediatrics, Medical School, Hannover; <sup>12</sup>Department of Pediatrics, University of Würzburg, Germany; <sup>13</sup>Department of Pediatric Hematology and Oncology, Charles University Prague, Prague, Czech Republic; <sup>14</sup>DCOG and Department of Pediatric Oncology/ Hematology, Erasmus Medical Center, Rotterdam, Netherlands; <sup>15</sup>Department of Pediatrics, Aarhus University Hospital Skejby, Aarhus, Denmark; <sup>16</sup>Pediatric Hematology/Oncology, University of Pavia Fondazione IRCCS Policlinico San Matteo, Pavia, Italy.

\*These authors contributed equally to the work

\*\*Corresponding author:

Mignon L Loh, University of California, Rm HSD-302 Box 0519, San Francisco, CA 94143; email: [lohm@pediatrics.ucsf.edu](mailto:lohm@pediatrics.ucsf.edu).

Or:

Charlotte M. Niemeyer, Department of Pediatrics, University of Freiburg, Mathildenstrasse 1, 79106 Freiburg, Germany; email: [charlotte.niemeyer@uniklinik-freiburg.de](mailto:charlotte.niemeyer@uniklinik-freiburg.de).

## Supplementary Figure 1

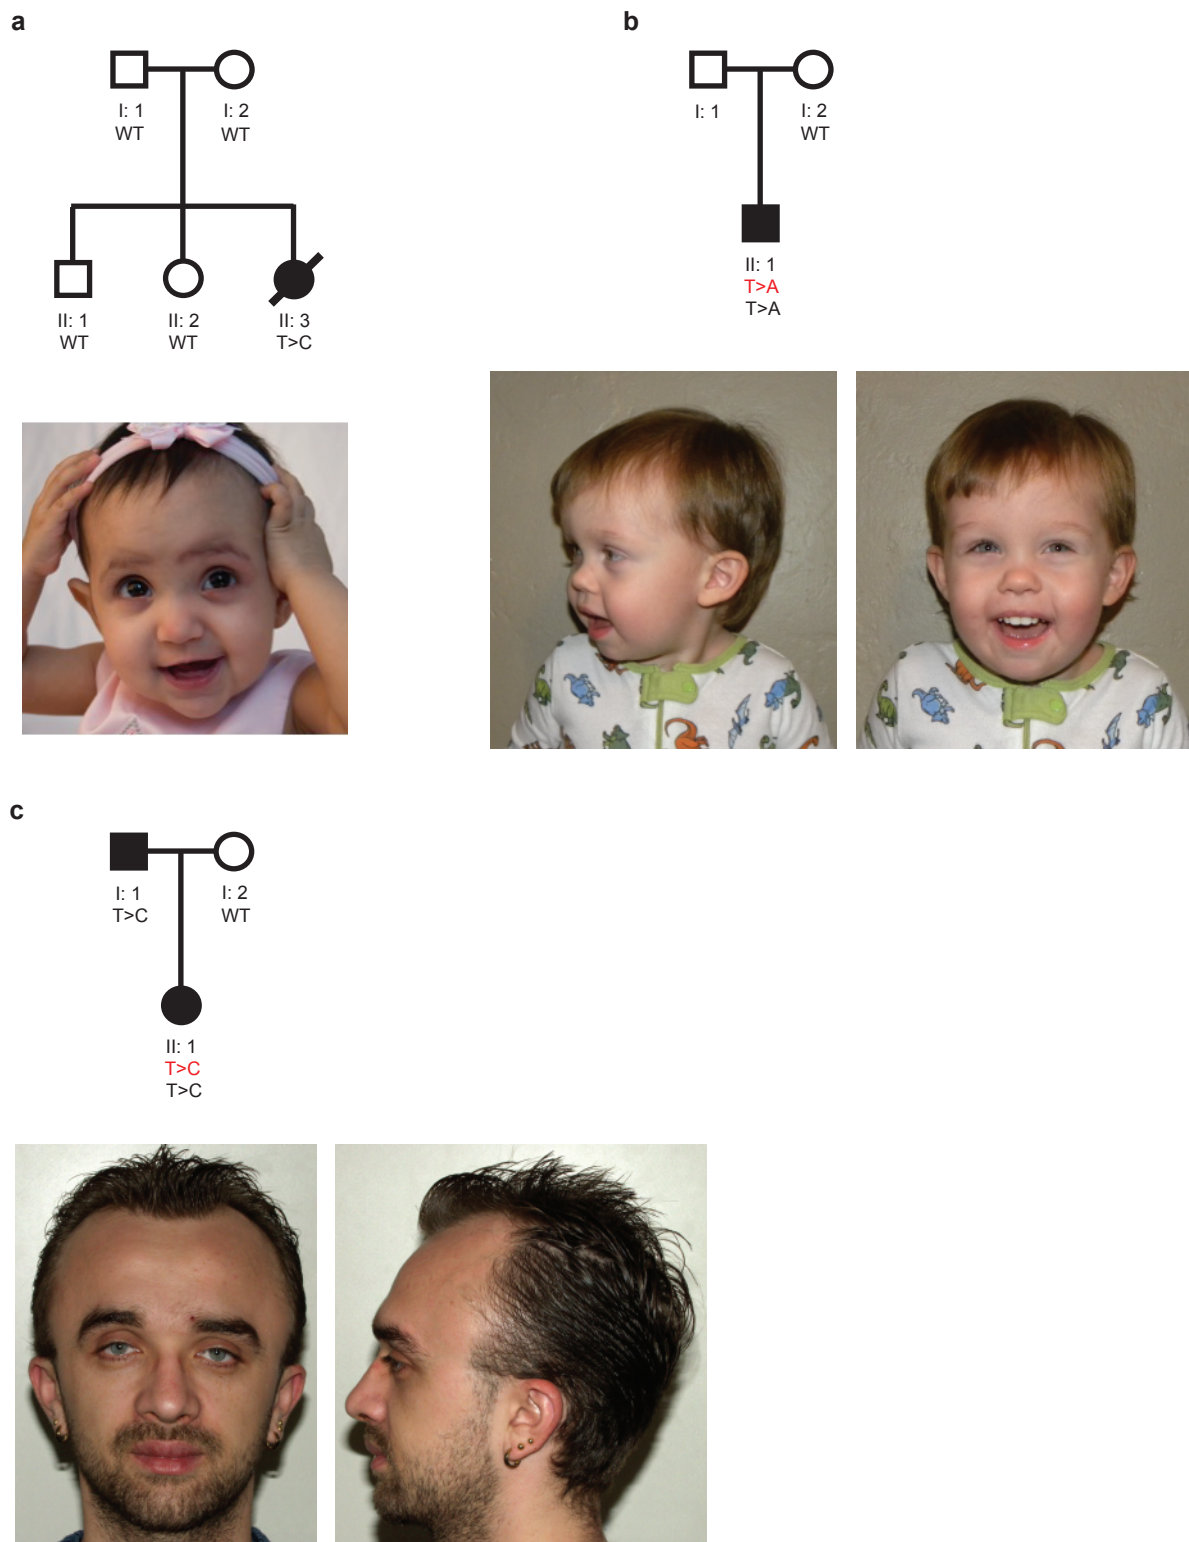

**Figure S1. Patients with *CBL* mutations exhibit different facial phenotypes.** Panel (a) depicts a child (UPN1241) with a homozygous p.Y371H who demonstrates low set ears, downslanting palpebral fissures and a narrow philtrum. Panel (b) demonstrates a child (UPN1178) with a homozygous p.Y371N who also shows mild frontal bossing as well as mild hypertelorism and a narrow philtrum. Panel (c) is the father of the child in Figure 1d (D703); he is heterozygous for the p.C384R mutation and displays downslanting palpebral fissures, ptosis, and low set ears. Informed consent to publish the pictures of these patients were obtained from their parents (main text, Figure 1, Supplementary information, figure S1a, b) or the father of the child in Figure 1d (Figure S1c).

## Supplementary Figure 2

|                 |                                                                                                                                        |                                                                                |                                                                               |
|-----------------|----------------------------------------------------------------------------------------------------------------------------------------|--------------------------------------------------------------------------------|-------------------------------------------------------------------------------|
|                 | end of exon 7                                                                                                                          | intron 7                                                                       |                                                                               |
| WT              | ATCAAAGTGACCCAG                                                                                                                        | -----                                                                          | -----                                                                         |
| D347-A          | ATCAAAGTGACCCAG                                                                                                                        | -----                                                                          | -----                                                                         |
| D347-B          | ATCAAAGTGACCCAG                                                                                                                        | -----                                                                          | -----                                                                         |
| D347-C          | ATCAAAGTGACCCAG                                                                                                                        | -----                                                                          | -----                                                                         |
| D647-A / I066-A | ATCAAAGTGACCCAG                                                                                                                        | GGTGGAGTTTGTTCACATTATAACCATATCACTGGACACAAGCTT                                  | TAGTATATTCTTTATAGAAGTACAGCATAATTGAATTCATTGGAACCCATTGACTAGATTAGTGAATTTGTGTGTAT |
| D647-B / I066-B | ATCAAAGTGACCCAG                                                                                                                        | -----                                                                          | -----                                                                         |
| D647-C / I066-C | ATCAAAGTGACCCAG                                                                                                                        | -----                                                                          | -----                                                                         |
|                 |                                                                                                                                        |                                                                                |                                                                               |
| WT              | -----                                                                                                                                  | -----                                                                          | -----                                                                         |
| D347-A          | -----                                                                                                                                  | -----                                                                          | -----                                                                         |
| D347-B          | -----                                                                                                                                  | -----                                                                          | -----                                                                         |
| D347-C          | GTGGTTTCACTTTAAACCTGGAGCTTAAAATAGGACCCAGACTAGATGCTTCTGGTTTAATAAAAAATAACCACCTGTTGTGACATTTTTATATAAGCAAAATTTGTATAGGAAACAAGTCTTCACTTTTCTGT | -----                                                                          | -----                                                                         |
| D647-A / I066-A | -----                                                                                                                                  | -----                                                                          | -----                                                                         |
| D647-B / I066-B | -----                                                                                                                                  | -----                                                                          | -----                                                                         |
| D647-C / I066-C | -----                                                                                                                                  | -----                                                                          | -----                                                                         |
|                 |                                                                                                                                        |                                                                                |                                                                               |
|                 |                                                                                                                                        | exon 8                                                                         |                                                                               |
| WT              | -----                                                                                                                                  | GAACAATATGAATTATACTGTGAGATGGGCTCCACATTCCAACTATGTAAAATATGTGCTGAAAATGATAAGGATGTA | -----                                                                         |
| D347-A          | -----                                                                                                                                  | -----                                                                          | GATGTA                                                                        |
| D347-B          | -----                                                                                                                                  | -----                                                                          | -----                                                                         |
| D347-C          | AACATTTATAATTGCAGTTATTATTCAACTAATAGTCTTTTAATTTTTTTAATCAAAC                                                                             | GAACAATATGAATTATACTGTGAGATGGGCTCCACATTCCAACTATGTAAAATATGTGCTGAAAATGATAAGGATGTA | -----                                                                         |
| D647-A / I066-A | -----                                                                                                                                  | GAACAATATGAATTATACTGTGAGATGGGCTCCACATTCCAACTATGTAAAATATGTGCTGAAAATGATAAGGATGTA | -----                                                                         |
| D647-B / I066-B | -----                                                                                                                                  | GAACAATATGAATTATACTGTGAGATGGGCTCCACATTCCAACTATGTAAAATATGTGCTGAAAATGATAAGGATGTA | -----                                                                         |
| D647-C / I066-C | -----                                                                                                                                  | GAACAATATGAATTATACTGTGAGATGGGCTCCACATTCCAACTATGTAAAATATGTGCTGAAAATGATAAGGATGTA | -----                                                                         |
|                 |                                                                                                                                        |                                                                                |                                                                               |
|                 |                                                                                                                                        | exon 9                                                                         |                                                                               |
| WT              | AAGATTGAGCCCTGTGGACACCTCATGTGCACATCCTGTCTTACATCCTGGCAG                                                                                 | GAATCAGAAGGTCAGGGCTGTCTTTCTGCCGATGTGAAATTAAGGTA                                | CTGTAACCCATCGTGGTAGATCCGTTTGATCCTAGA                                          |
| D347-A          | AAGATTGAGCCCTGTGGACACCTCATGTGCACATCCTGTCTTACATCCTGGCAG                                                                                 | GAATCAGAAGGTCAGGGCTGTCTTTCTGCCGATGTGAAATTAAGGTA                                | CTGTAACCCATCGTGGTAGATCCGTTTGATCCTAGA                                          |
| D347-B          | AAGATTGAGCCCTGTGGACACCTCATGTGCACATCCTGTCTTACATCCTGGCAG                                                                                 | GAATCAGAAGGTCAGGGCTGTCTTTCTGCCGATGTGAAATTAAGGTA                                | CTGTAACCCATCGTGGTAGATCCGTTTGATCCTAGA                                          |
| D347-C          | AAGATTGAGCCCTGTGGACACCTCATGTGCACATCCTGTCTTACATCCTGGCAG                                                                                 | GAATCAGAAGGTCAGGGCTGTCTTTCTGCCGATGTGAAATTAAGGTA                                | CTGTAACCCATCGTGGTAGATCCGTTTGATCCTAGA                                          |
| D647-A / I066-A | AAGATTGAGCCCTGTGGACACCTCATGTGCACATCCTGTCTTACATCCTGGCAG                                                                                 | GAATCAGAAGGTCAGGGCTGTCTTTCTGCCGATGTGAAATTAAGGTA                                | CTGTAACCCATCGTGGTAGATCCGTTTGATCCTAGA                                          |
| D647-B / I066-B | AAGATTGAGCCCTGTGGACACCTCATGTGCACATCCTGTCTTACATCCTGGCAG                                                                                 | GAATCAGAAGGTCAGGGCTGTCTTTCTGCCGATGTGAAATTAAGGTA                                | CTGTAACCCATCGTGGTAGATCCGTTTGATCCTAGA                                          |
| D647-C / I066-C | AAGATTGAGCCCTGTGGACACCTCATGTGCACATCCTGTCTTACATCCTGGCAG                                                                                 | GAATCAGAAGGTCAGGGCTGTCTTTCTGCCGATGTGAAATTAAGGTA                                | CTGTAACCCATCGTGGTAGATCCGTTTGATCCTAGA                                          |
|                 |                                                                                                                                        |                                                                                |                                                                               |
|                 |                                                                                                                                        |                                                                                | beginning of exon 10                                                          |
| WT              | GGGAGTGGCAGCCTGTTGAGGCAAGGAGCAGAGGGAGCTCCCTCCCCAAATATGATGATGATGATGATGAACGAGCTGATGATACTCTCTTCATGATGAAGGAATTGGCTGGTGCCAA                 | GTGGAACGGCCGCTTCTC                                                             | -----                                                                         |
| D347-A          | GGGAGTGGCAGCCTGTTGAGGCAAGGAGCAGAGGGAGCTCCCTCCCCAAATATGATGATGATGATGATGAACGAGCTGATGATACTCTCTTCATGATGAAGGAATTGGCTGGTGCCAA                 | GTGGAACGGCCGCTTCTC                                                             | -----                                                                         |
| D347-B          | GGGAGTGGCAGCCTGTTGAGGCAAGGAGCAGAGGGAGCTCCCTCCCCAAATATGATGATGATGATGATGAACGAGCTGATGATACTCTCTTCATGATGAAGGAATTGGCTGGTGCCAA                 | GTGGAACGGCCGCTTCTC                                                             | -----                                                                         |
| D347-C          | GGGAGTGGCAGCCTGTTGAGGCAAGGAGCAGAGGGAGCTCCCTCCCCAAATATGATGATGATGATGATGAACGAGCTGATGATACTCTCTTCATGATGAAGGAATTGGCTGGTGCCAA                 | GTGGAACGGCCGCTTCTC                                                             | -----                                                                         |
| D647-A / I066-A | GGGAGTGGCAGCCTGTTGAGGCAAGGAGCAGAGGGAGCTCCCTCCCCAAATATGATGATGATGATGATGAACGAGCTGATGATACTCTCTTCATGATGAAGGAATTGGCTGGTGCCAA                 | GTGGAACGGCCGCTTCTC                                                             | -----                                                                         |
| D647-B / I066-B | GGGAGTGGCAGCCTGTTGAGGCAAGGAGCAGAGGGAGCTCCCTCCCCAAATATGATGATGATGATGATGAACGAGCTGATGATACTCTCTTCATGATGAAGGAATTGGCTGGTGCCAA                 | GTGGAACGGCCGCTTCTC                                                             | -----                                                                         |
| D647-C / I066-C | GGGAGTGGCAGCCTGTTGAGGCAAGGAGCAGAGGGAGCTCCCTCCCCAAATATGATGATGATGATGATGAACGAGCTGATGATACTCTCTTCATGATGAAGGAATTGGCTGGTGCCAA                 | GTGGAACGGCCGCTTCTC                                                             | -----                                                                         |

Figure S2. DNA sequences from the patients with splice site variants. The splice site mutation from D347 is highlighted in blue. Premature stop codons are highlighted in red.

**Supplementary Note:** All of the subjects studied in this project participated in research protocols that have been approved by local institutional review boards. Patients and families were referred to EWOG-MDS and/or UCSF based on the known interest in JMML demonstrated over the years by Drs. Loh and Niemeyer. A large clinical database is maintained by EWOG-MDS.
